# Supplementary material for: Genome-wide screening of the genes required for tolerance to vanillin, which is a potential inhibitor of bioethanol fermentation, in Saccharomyces cerevisiae
Source: Springer Nature journal article supplement (doi:10.1186/1754-6834-1-3), 2008-04-15
Supplement: Additional file 2 [file 1754-6834-1-3-s2.doc]

## Additional file 2 - Cross-sensitivity of vanillin sensitive mutants to various inhibitors

|  |  |  | Sensitivitya | | | | | | |
| --- | --- | --- | --- | --- | --- | --- | --- | --- | --- |
|  | ORF | Gene | VA | HBb | GUb | SYb | FUc | HMFc | AAd |
| Metabolism | | | | | | | | | |
|  | YML115C | *VAN1* | 0.25 | 0.13 | 0.05 | 0.11 | 0.40 | 0.06 | 0.57 |
|  | YJR105W | *ADO1* | 0.15 | 0.35 | 0.13 | 0.34 | 0.29 | 1.02 | 0.81 |
|  | YKL211C | *TRP3* | 0.14 | 0.30 | 0.02 | 0.45 | 0.13 | 0.87 | 0.10 |
|  | YLR056W | *ERG3* | 0.20 | 0.05 | 0.06 | 0.12 | 0.05 | 0.26 | 0.02 |
|  | YML008C | *ERG6* | 0.29 | 0.03 | 0.03 | 0.04 | 0.03 | 0.08 | 0.02 |
|  | YMR202W | *ERG2* | 0.03 | 0.06 | 0.03 | 0.13 | 0.05 | 0.57 | 0.02 |
|  | YNL280C | *ERG24* | 0.19 | 0.04 | 0.02 | 0.10 | 0.09 | 0.27 | 0.01 |
|  | YMR307W | *GAS1* | 0.09 | 1.25 | 0.32 | 1.01 | 0.32 | 0.98 | 0.76 |
|  | YPL188W | *POS5* | 0.18 | 0.49 | 0.32 | 0.36 | 0.51 | 1.41 | 0.35 |
|  | YBR249C | *ARO4* | 0.19 | 0.58 | 0.15 | 0.70 | 0.11 | 0.29 | 0.46 |
|  | YDR028C | *REG1* | 0.29 | 0.06 | 0.03 | 0.16 | 0.03 | 0.66 | 0.02 |
|  | YEL053C | *MAK10* | 0.12 | 0.36 | 0.56 | 0.37 | 0.60 | 1.07 | 0.63 |
| Cell cycle and DNA processing | | | | | | | | | |
|  | YML041C | *VPS71* | 0.15 | 0.48 | 0.29 | 0.45 | 0.23 | 0.77 | 0.15 |
|  | YKR019C | *IRS4* | 0.29 | 0.28 | 0.36 | 0.34 | 0.43 | 1.02 | 0.65 |
|  | YCR028C-A | *RIM1* | 0.05 | 0.01 | 0.01 | 0.09 | 0.01 | 0.04 | 0.01 |
|  | YNL107W | *YAF9* | 0.12 | 0.20 | 0.03 | 0.14 | 0.13 | 0.22 | 0.09 |
|  | YML124C | *TUB3* | 0.30 | 0.29 | 0.45 | 0.61 | 0.60 | 0.89 | 0.54 |
|  | YAL011W | *SWC3* | 0.24 | 0.19 | 0.05 | 0.08 | 0.09 | 0.47 | 0.02 |
|  | YLR085C | *ARP6* | 0.20 | 0.53 | 0.67 | 0.46 | 0.64 | 0.33 | 0.58 |
|  | YOL012C | *HTZ1* | 0.13 | 0.32 | 0.17 | 0.26 | 0.28 | 0.33 | 0.12 |
|  | YBR231C | *SWC5* | 0.09 | 0.67 | 0.31 | 0.47 | 0.24 | 0.36 | 0.19 |
|  | YCL029C | *BIK1* | 0.17 | 0.24 | 0.10 | 0.45 | 0.18 | 0.58 | 0.46 |
|  | YDL225W | *SHS1* | 0.23 | 0.67 | 0.08 | 0.38 | 0.31 | 0.64 | 0.06 |
|  | YDR004W | *RAD57* | 0.08 | 0.84 | 0.12 | 0.62 | 0.28 | 0.98 | 0.55 |
|  | YDR150W | *NUM1* | 0.10 | 0.72 | 0.38 | 0.56 | 0.38 | 0.42 | 0.43 |
|  | YDR439W | *LRS4* | 0.19 | 0.77 | 0.22 | 0.69 | 0.24 | 0.93 | 0.38 |
|  | YDR485C | *VPS72* | 0.25 | 0.60 | 0.18 | 0.44 | 0.29 | 0.61 | 0.14 |
|  | YGR063C | *SPT4* | 0.12 | 0.88 | 0.55 | 0.83 | 0.56 | 0.71 | 0.57 |
|  | YDR334W | *SWR1* | 0.20 | 0.36 | 0.32 | 0.40 | 0.42 | 0.37 | 0.28 |
| Transcription | | | | | | | | | |
|  | YJR063W | *RPA12* | 0.16 | 1.10 | 0.94 | 0.98 | 0.98 | 1.30 | 0.90 |
|  | YAL021C | *CCR4* | 0.18 | 0.45 | 0.27 | 0.23 | 0.59 | 1.41 | 0.19 |
|  | YNL248C | *RPA49* | 0.03 | 0.49 | 0.03 | 0.58 | 0.17 | 0.53 | 0.53 |
|  | YNL025C | *SSN8* | 0.25 | 0.23 | 0.03 | 0.50 | 0.06 | 0.26 | 0.87 |
|  | YDL213C | *NOP6* | 0.08 | 0.46 | 0.15 | 0.33 | 0.28 | 0.47 | 0.18 |
| Protein synthesis | | | | | | | | | |
|  | YBR191W | *RPL21A* | 0.26 | 0.32 | 0.61 | 0.65 | 0.45 | 0.72 | 0.43 |
|  | YLR448W | *RPL6B* | 0.23 | 0.56 | 0.36 | 0.79 | 0.49 | 0.69 | 0.83 |
|  | YKR057W | *RPS21A* | 0.05 | 0.57 | 0.16 | 0.61 | 0.34 | 0.63 | 0.46 |
|  | YLR185W | *RPL37A* | 0.17 | 0.28 | 0.25 | 0.41 | 0.39 | 0.35 | 0.78 |
|  | YDR418W | *RPL12B* | 0.14 | 0.35 | 0.03 | 0.45 | 0.04 | 0.17 | 0.09 |
|  | YGR165W | *MRPS35* | 0.14 | 0.46 | 0.57 | 0.34 | 0.72 | 0.45 | 0.77 |
| Protein fate (folding, modification, destination) | | | | | | | | | |
|  | YOL141W | *PPM2* | 0.25 | 0.75 | 0.35 | 0.62 | 0.45 | 0.44 | 0.38 |
|  | YNL119W | *NCS2* | 0.22 | 0.55 | 0.25 | 0.64 | 0.46 | 1.49 | 0.75 |
|  | YKL048C | *ELM1* | 0.12 | 0.33 | 0.10 | 0.45 | 0.10 | 0.59 | 0.46 |
|  | YDR162C | *NBP2* | 0.21 | 0.05 | 0.42 | 0.24 | 0.35 | 0.52 | 0.56 |
|  | YDR283C | *GCN2* | 0.13 | 0.70 | 0.78 | 0.44 | 0.55 | 0.56 | 0.87 |
| Cellular transport, transport facilitation and transport routes | | | | | | | | | |
|  | YOL158C | *ENB1* | 0.20 | 0.89 | 0.23 | 0.87 | 0.39 | 0.80 | 0.66 |
|  | YJL129C | *TRK1* | 0.16 | 0.85 | 0.36 | 0.85 | 0.58 | 0.95 | 0.59 |
|  | YKL212W | *SAC1* | 0.29 | 0.16 | 0.02 | 0.21 | 0.12 | 0.25 | 0.01 |
|  | YKR001C | *VPS1* | 0.14 | 0.09 | 0.34 | 0.14 | 0.52 | 0.76 | 0.02 |
|  | YKR020W | *VPS51* | 0.05 | 0.07 | 0.17 | 0.13 | 0.14 | 0.32 | 0.05 |
|  | YLR130C | *ZRT2* | 0.23 | 0.71 | 0.25 | 0.69 | 0.43 | 0.43 | 0.80 |
|  | YNL084C | *END3* | 0.21 | 0.44 | 0.40 | 0.32 | 0.30 | 0.42 | 0.10 |
|  | YNL041C | *COG6* | 0.30 | 0.18 | 0.43 | 0.39 | 0.65 | 0.60 | 0.22 |
|  | YOR070C | *GYP1* | 0.29 | 0.05 | 0.34 | 0.41 | 0.66 | 0.86 | 0.60 |
|  | YOR106W | *VAM3* | 0.16 | 0.25 | 1.14 | 0.32 | 1.08 | 0.79 | 0.84 |
|  | YBR164C | *ARL1* | 0.26 | 0.13 | 0.71 | 0.14 | 0.41 | 0.63 | 0.17 |
|  | YDL226C | *GCS1* | 0.19 | 0.53 | 0.56 | 0.74 | 0.63 | 0.84 | 0.39 |
|  | YER019C-A | *SBH2* | 0.25 | 0.95 | 0.30 | 0.97 | 0.47 | 1.20 | 0.95 |
|  | YGL005C | *COG7* | 0.22 | 0.29 | 0.27 | 0.54 | 0.30 | 0.74 | 0.31 |
|  | YGL054C | *ERV14* | 0.28 | 0.45 | 0.05 | 0.64 | 0.19 | 0.80 | 0.30 |
|  | YGR037C | *ACB1* | 0.27 | 0.65 | 1.05 | 0.67 | 0.77 | 0.47 | 0.22 |
|  | YHL031C | *GOS1* | 0.26 | 0.16 | 1.03 | 0.29 | 0.95 | 0.81 | 0.91 |
|  | YDR484W | *VPS52* | 0.28 | 0.07 | 0.20 | 0.19 | 0.18 | 0.38 | 0.12 |
| Other | | | | | | | | | |
|  | YJR033C | *RAV1* | 0.29 | 0.25 | 0.50 | 0.34 | 0.57 | 1.33 | 0.14 |
|  | YBR078W | *ECM33* | 0.30 | 0.26 | 0.10 | 0.33 | 0.44 | 0.64 | 0.01 |
|  | YDR388W | *RVS167* | 0.11 | 0.03 | 0.06 | 0.20 | 0.21 | 0.47 | 0.25 |
| Unclassified proteins | | | | | | | | | |
|  | YOL159C |  | 0.20 | 0.62 | 0.25 | 0.66 | 0.58 | 1.02 | 0.55 |
|  | YDR417C |  | 0.28 | 0.19 | 0.03 | 0.33 | 0.06 | 0.26 | 0.24 |
|  | YML010C-B |  | 0.26 | 0.59 | 0.86 | 0.88 | 0.86 | 1.07 | 0.96 |
|  | YLR062C | *BUD28* | 0.28 | 0.30 | 0.38 | 0.23 | 0.62 | 0.28 | 0.45 |
|  | YLR261C | *VPS63* | 0.20 | 0.19 | 0.47 | 0.35 | 0.72 | 0.85 | 0.70 |
|  | YPL205C |  | 0.22 | 0.36 | 1.18 | 0.39 | 1.19 | 0.81 | 0.35 |
|  | YDR024W | *FYV1* | 0.10 | 0.63 | 0.10 | 0.48 | 0.42 | 0.83 | 0.36 |
|  | YDR049W |  | 0.30 | 0.19 | 0.29 | 0.30 | 0.11 | 0.04 | 0.02 |
|  | YDR136C | *VPS61* | 0.28 | 0.15 | 0.87 | 0.31 | 0.22 | 0.33 | 0.10 |
|  | YGR064W |  | 0.18 | 0.06 | 0.28 | 0.15 | 0.61 | 0.25 | 0.15 |

aValues of sensitivity were defined in methods; values < 0.3 are shaded. All experiments were carried out in duplicate, and the average of the values obtained was used for the evaluation of sensitivity.

bSensitivity to phenolic compounds was assessed using YPD containing 7 mM HB, 7 mM syringaldehyde or 16 mM guaiacol.

cSensitivity to furan derivatives was assessed using YPD containing 11 mM furfural or 15 mM HMF.

dSensitivity to weak acid was assessed using YPD containing 70 mM acetic acid.

VA, vanillin; HB, 4-hydroxybenzoic acid; GU, guaiacol; SY, syringaldehyde; FU, furfural; HMF, 5-hydroxymethylfurfural; AA, acetic acid.
